# Supplementary material for: N6-Methyladenine DNA modification in Xanthomonas oryzae pv. oryzicola genome
Source: PubMed Central journal article supplement (PMC6215013; doi:10.1038/s41598-018-34559-5), 2018-11-02
Supplement: 41598_2018_34559_MOESM1_ESM.pdf [file 41598_2018_34559_MOESM1_ESM.pdf]

# **N6-Methyladenine DNA modification in *Xanthomonas oryzae* pv. *oryzicola* genome**

**Chuan-Le Xiao<sup>1, #</sup>, Shang-Qian Xie<sup>2, #</sup>, Qing-Biao Xie<sup>2</sup>, Zhao-Yu Liu<sup>2</sup>, Jian-Feng Xing<sup>2</sup>, Kai-Kai Ji<sup>2</sup>, Jun Tao<sup>2, \*</sup>, Liang-Ying Dai<sup>1, \*</sup>, Feng Luo<sup>1, 3, \*</sup>**

<sup>1</sup> Southern Regional Collaborative Innovation Center for Grain and Oil Crops in China, College of Plant Protection, Hunan Agricultural University, Changsha, China

<sup>2</sup> Hainan Key Laboratory for Sustainable Utilization of Tropical Bioresources, Institute of Tropical Agriculture and Forestry, Hainan University, Haikou 570228, China

<sup>3</sup> School of Computing, Clemson University, Clemson, 29634-0974, USA

# These authors contributed equally to the manuscript as first authors.

\* To whom correspondence should be addressed:

Feng Luo: Email: luofeng@clemson.edu

Liang-Ying Dai: Email: daily@hunau.net

Jun Tao: Email: taoj@hainu.edu.cn

Table S1. The datasets of seven Xoc strains in this study

| Strain   | Sample ID    | SMRT cell | Total length of subreads (Gb) | Coverage | Reference link                                                                                                                                    |
|----------|--------------|-----------|-------------------------------|----------|---------------------------------------------------------------------------------------------------------------------------------------------------|
| BLS256   | SAMN03612250 | 5         | 1.94                          | 421x     | <a href="https://www.ncbi.nlm.nih.gov/genome/529?genome_assembly_id=233712">https://www.ncbi.nlm.nih.gov/genome/529?genome_assembly_id=233712</a> |
| BLS279   | SAMN03612248 | 4         | 1.66                          | 362x     | <a href="https://www.ncbi.nlm.nih.gov/genome/529?genome_assembly_id=233507">https://www.ncbi.nlm.nih.gov/genome/529?genome_assembly_id=233507</a> |
| CFBP2286 | SAMN03612252 | 6         | 2.03                          | 425x     | <a href="https://www.ncbi.nlm.nih.gov/genome/529?genome_assembly_id=233505">https://www.ncbi.nlm.nih.gov/genome/529?genome_assembly_id=233505</a> |
| CFBP7331 | SAMN03612260 | 7         | 2.11                          | 442x     | <a href="https://www.ncbi.nlm.nih.gov/genome/529?genome_assembly_id=233509">https://www.ncbi.nlm.nih.gov/genome/529?genome_assembly_id=233509</a> |
| CFBP7341 | SAMN03612287 | 4         | 1.85                          | 387x     | <a href="https://www.ncbi.nlm.nih.gov/genome/529?genome_assembly_id=233510">https://www.ncbi.nlm.nih.gov/genome/529?genome_assembly_id=233510</a> |
| L8       | SAMN03612258 | 4         | 1.33                          | 291x     | <a href="https://www.ncbi.nlm.nih.gov/genome/529?genome_assembly_id=233511">https://www.ncbi.nlm.nih.gov/genome/529?genome_assembly_id=233511</a> |
| RS105    | SAMN03612254 | 4         | 1.80                          | 395x     | <a href="https://www.ncbi.nlm.nih.gov/genome/529?genome_assembly_id=233512">https://www.ncbi.nlm.nih.gov/genome/529?genome_assembly_id=233512</a> |

Table S2. The stop codon usage in seven strains

| Strain   | Normal stop codon |                 |                 | 6mA stop codon |                |                |
|----------|-------------------|-----------------|-----------------|----------------|----------------|----------------|
|          | TGA               | TAA             | TAG             | TGA            | TAA            | TAG            |
| BLS256   | 2681<br>(67.63%)  | 817<br>(20.61%) | 466<br>(11.76%) | 56<br>(49.56%) | 47<br>(41.59%) | 10<br>(8.85%)  |
| BLS279   | 2697<br>(68.19%)  | 805<br>(20.35%) | 453<br>(11.46%) | 66<br>(51.56%) | 49<br>(38.28%) | 13<br>(10.16%) |
| CFBP2286 | 2807<br>(67.51%)  | 860<br>(20.68%) | 491<br>(11.81%) | 80<br>(60.15%) | 42<br>(31.58%) | 11<br>(8.27%)  |
| CFBP7331 | 2762<br>(67.28%)  | 866<br>(21.10%) | 477<br>(11.62%) | 73<br>(50.69%) | 59<br>(40.97%) | 12<br>(8.34%)  |
| CFBP7341 | 2803<br>(67.32%)  | 874<br>(20.98%) | 487<br>(11.70%) | 45<br>(47.37%) | 47<br>(49.47%) | 3<br>(3.16%)   |
| L8       | 2714<br>(67.85%)  | 831<br>(20.78%) | 455<br>(11.37%) | 42<br>(55.26%) | 26<br>(34.21%) | 8<br>(10.53%)  |
| RS105    | 2696<br>(68.20%)  | 807<br>(20.42%) | 450<br>(11.38%) | 59<br>(48.76%) | 49<br>(40.50%) | 13<br>(10.74%) |

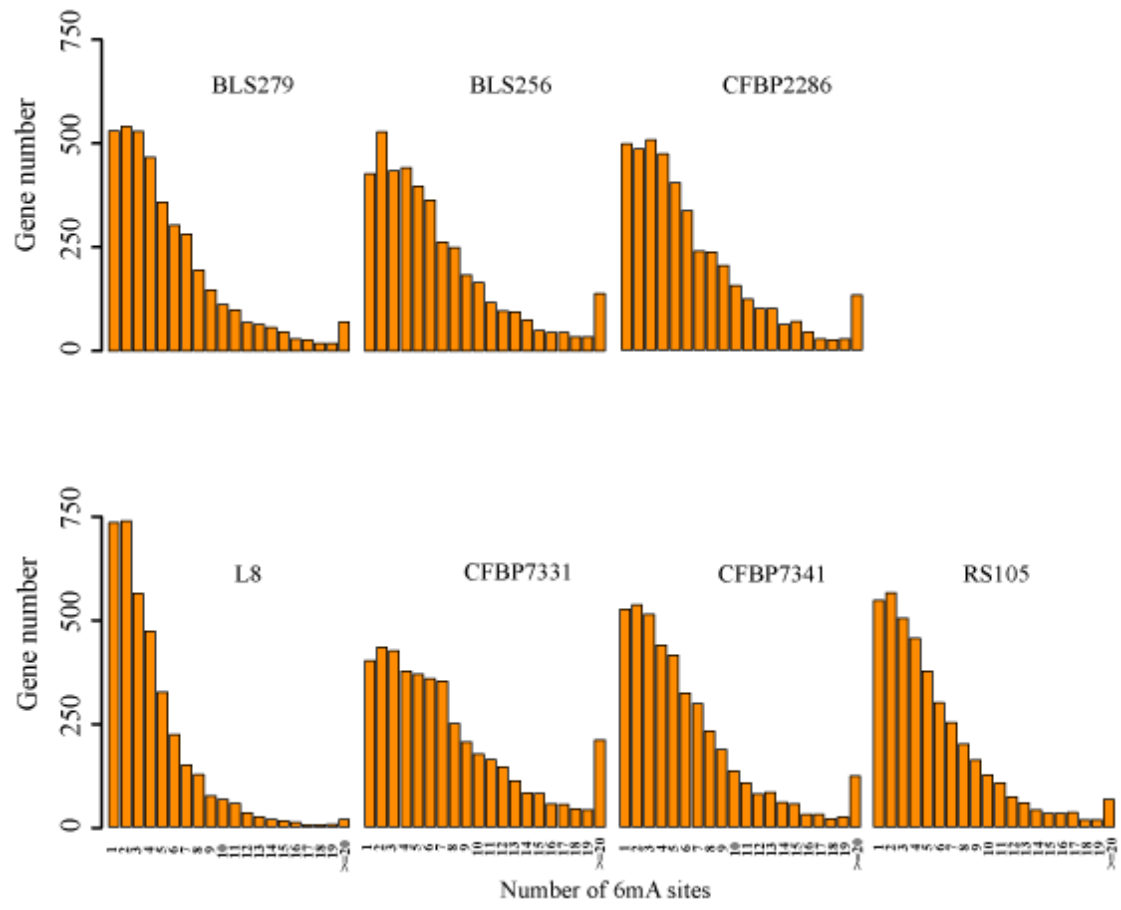

Figure S1. The located 6mA sites number of all genes in seven strains.

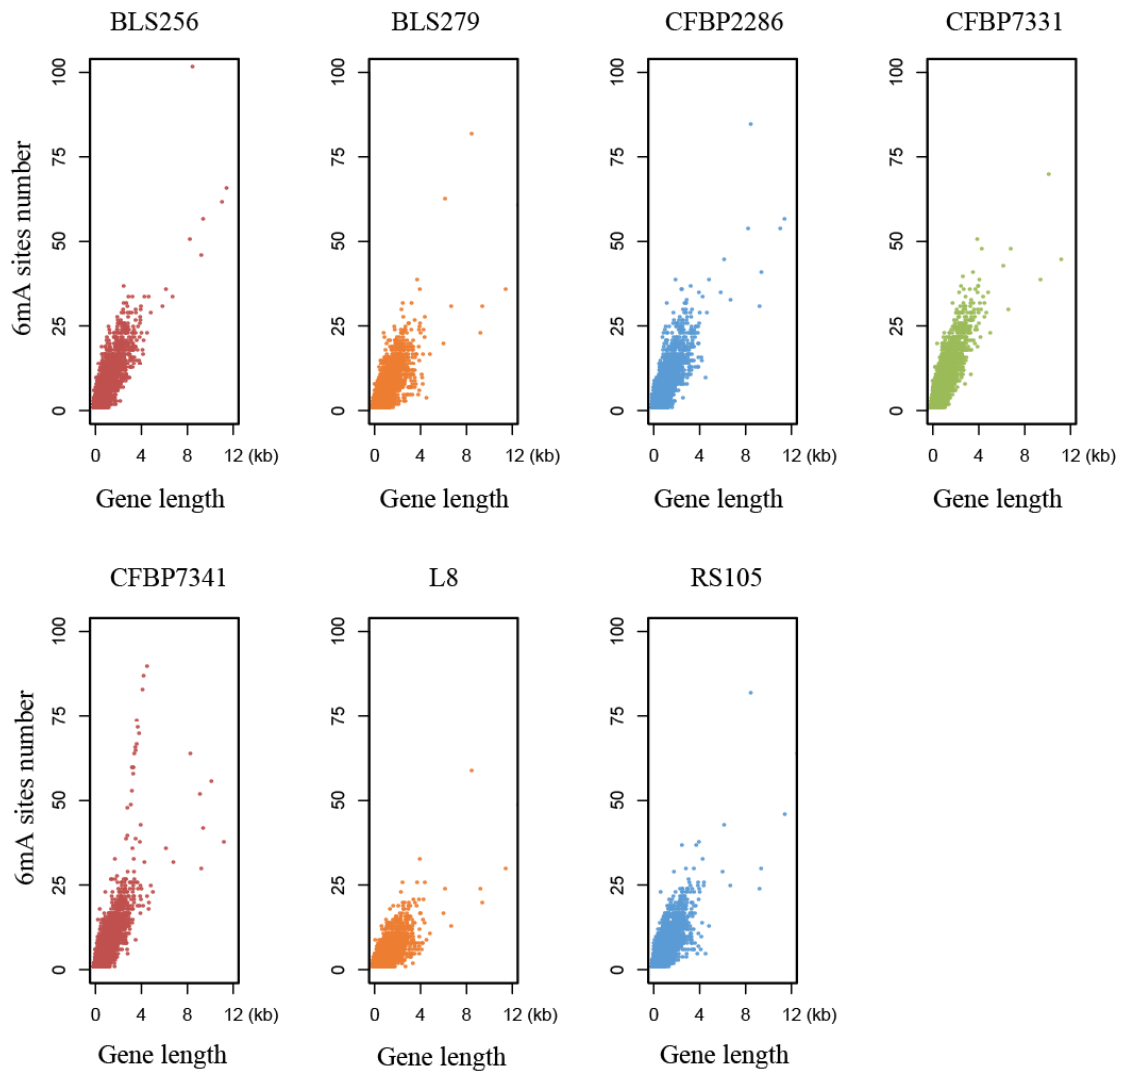

Figure S2. The scatter plot of 6mA sites numbers and gene length in seven strains.

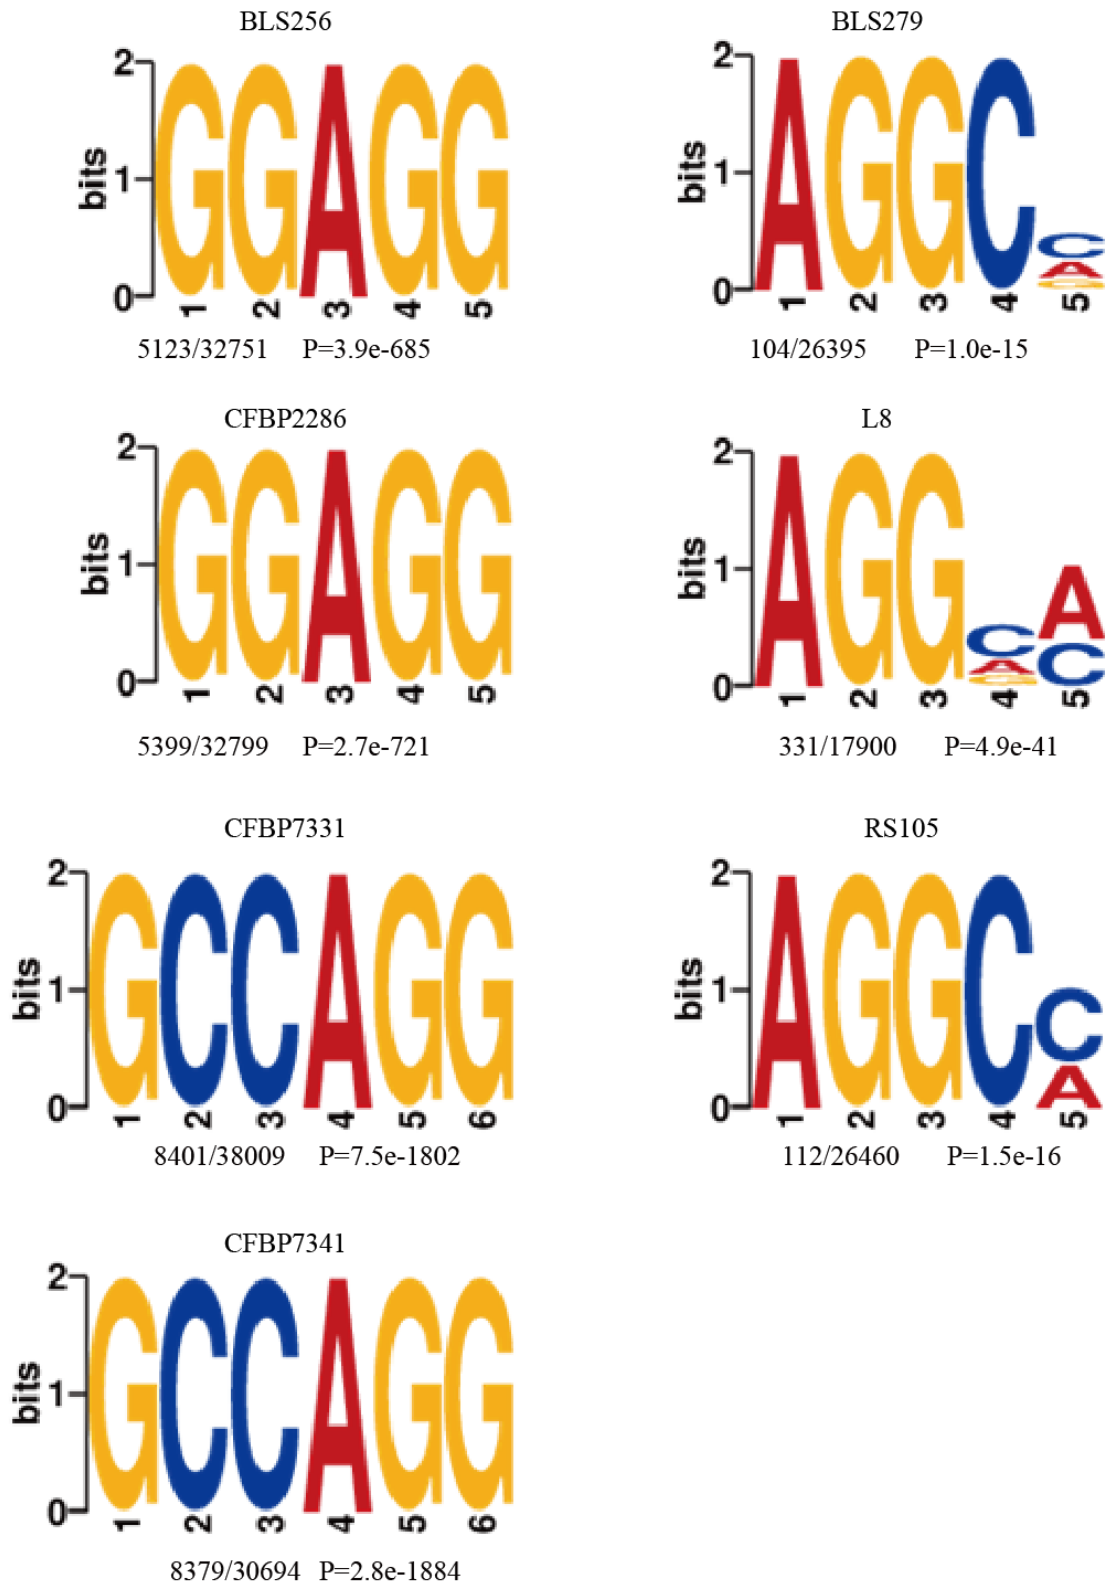

Figure S3. The identified consensus motifs containing 6mA sites in seven strains.

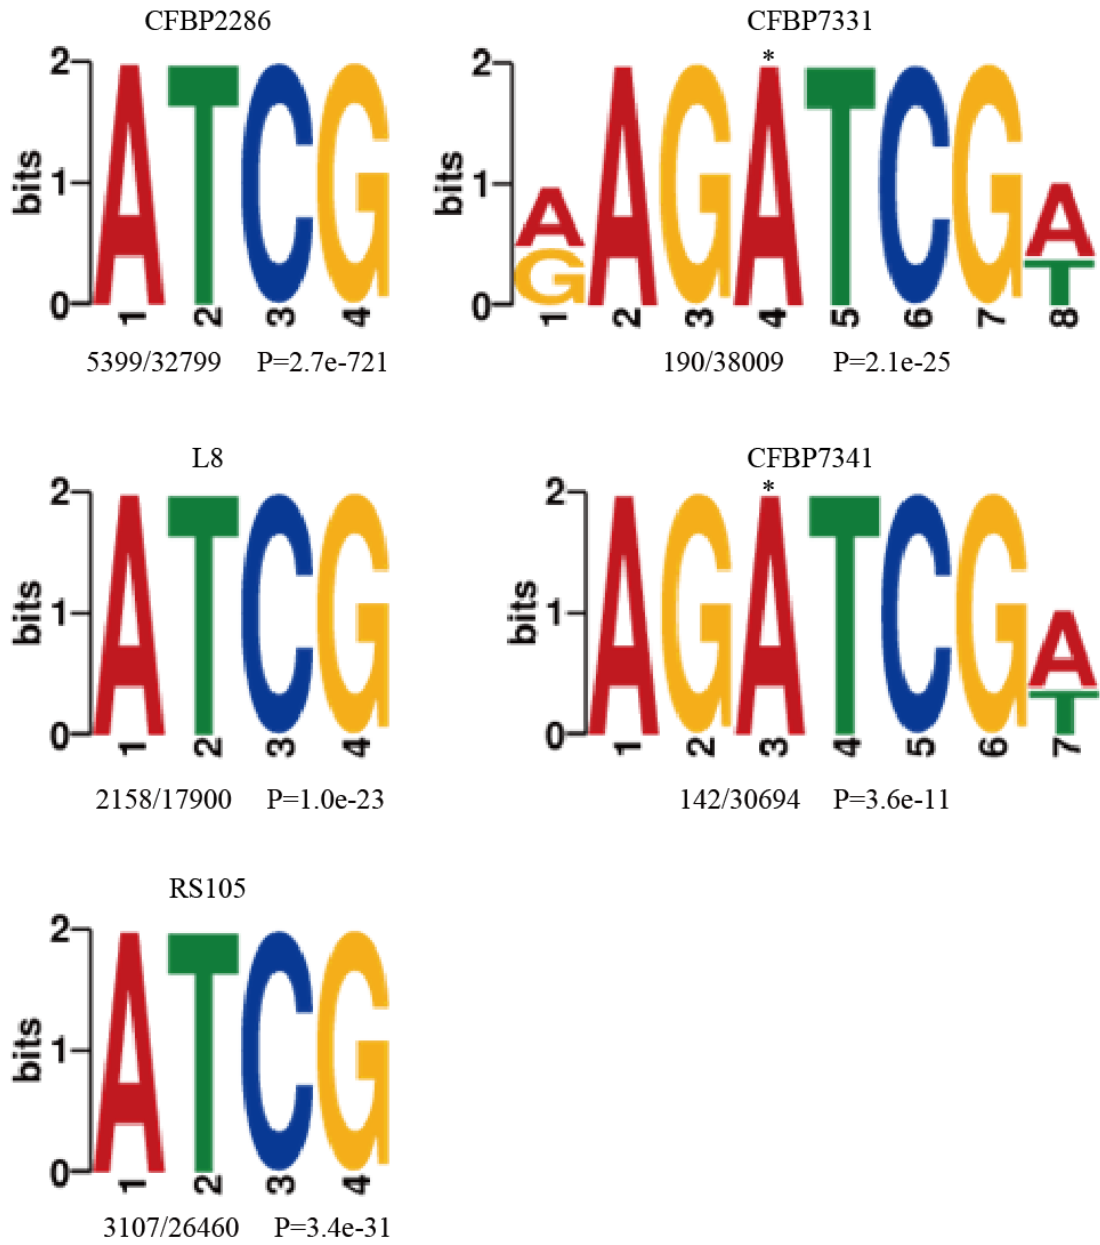

Figure S4. The identified ATCG motif containing 6mA sites in partial strains.
